# Supplementary material for: Insight into the nature and the transformation of the hydroxyl species in the CeY zeolite
Source: Royal Society of Chemistry journal article supplement (doi:10.1039/d1qi01564h), 2022-01-01
Supplement: d1qi01564h1.pdf [file d1qi01564h1.pdf]

## Supplementary Information

### Insight into the Nature and the Transformation of the Hydroxyl Species in the CeY zeolite

Yu Hui <sup>a,b,#</sup>, Jian Zheng <sup>a,b,#</sup>, Yucai Qin <sup>\*b</sup>, Xiaohui Du <sup>c</sup>, Yun Zu <sup>d</sup>, Jiabao Yang <sup>a,b</sup>,

Shuhong Sun <sup>c</sup>, Xionghou Gao <sup>c</sup>, Zhaolin Sun <sup>a,b</sup>, Lijuan Song <sup>\*a,b</sup>

*<sup>a</sup>College of Chemistry and Chemical Engineering, China University of Petroleum (East  
China Qingdao 266555, Shandong Province, P. R. China;*

*<sup>b</sup>Key Laboratory of Petrochemical Catalytic Science and Technology, Liaoning  
Petrochemical University, Fushun 113001, Liaoning Province, P. R. China;*

*<sup>c</sup>Lanzhou Petrochemical Research Center, Petrochemical Research Institute, Petro  
China Company Limited, Lanzhou 730060, P. R.China;*

*<sup>d</sup>Faculty of Chemical Engineering, Kunming University of Science and Technology,  
Kunming 650500, P. R. China.*

# These authors contributed equally

**Table S1.** Element components in the zeolite samples used (without H<sub>2</sub>O) deduced from the data detected by the XRF.

| Sample                   | XRF (wt %) |       |
|--------------------------|------------|-------|
|                          | Ce         | Na    |
| NaY                      | -          | 8.775 |
| 0.0025CeNaY-1            | 1.029      | 8.111 |
| 0.005CeNaY-1             | 1.837      | 7.728 |
| 0.01CeNaY-1              | 3.847      | 6.638 |
| 0.015CeNaY-1             | 6.640      | 5.270 |
| 0.025CeNaY-1             | 9.274      | 3.869 |
| 0.05CeNaY-1              | 12.298     | 2.534 |
| 0.075CeNaY-1             | 12.310     | 2.529 |
| 0.1CeNaY-1               | 12.306     | 2.516 |
| 0.05CeNaY-2 <sup>a</sup> | 17.342     | 1.031 |

a: Ce ion exchange concentration is 0.05 mol L<sup>-1</sup> and exchange-calcination process repeated twice.

**Table S2** Summary of Plausible OH groups on CeY zeolite.

|         | OH group                                                                | $\nu_{\text{O-H}}$ , cm <sup>-1</sup> |
|---------|-------------------------------------------------------------------------|---------------------------------------|
|         | terminal silanol groups (Si-OH)                                         | 3744                                  |
|         | Extra-framework Al hydroxyl species (Al-OH)                             | 3690                                  |
|         | Isolated Si-OH-Al in the supercage (Si-OH-Al)                           | 3640                                  |
|         | Si-OH-Al in the supercage (O(1)H)                                       | 3635                                  |
| HF band | perturbed Si-OH-Al in the supercage (O(1)H...O(H)Ce <sup>3+</sup> )     | 3622                                  |
|         | perturbed Si-OH-Al in the supercage (O(1)H...O(H)Al <sup>3+</sup> )     | 3613                                  |
|         | Si-OH-Al in the sodalite cage (O(2)H or O(3)H)                          | 3556                                  |
| LF band | perturbed Si-OH-Al in the sodalite cage (O(2)H...O(H)Ce <sup>3+</sup> ) | 3523                                  |
|         | Ce hydroxyl species (Ce-OH)                                             | 3574                                  |

**Table S3** Distribution of Brønsted and Lewis acidity in the 0.05CeNaY samples with various calcination temperature.

| Samples                    | 150 °C (mmol/g) |        |
|----------------------------|-----------------|--------|
|                            | BAS             | LAS    |
| 0.05CeNaY-200 <sup>a</sup> | 0.1481          | 0.0726 |
| 0.05CeNaY-350 <sup>b</sup> | 0.1595          | 0.0759 |
| 0.05CeNaY-550 <sup>c</sup> | 0.1023          | 0.0599 |

<sup>a</sup> Calculations based on the method reported by Emeis (*J. Catal.*, 1993, 141, 347–354), BAS and LAS represent the amount of Brønsted and Lewis acid, respectively.

**Table S4** Distribution of Brønsted and Lewis acidity in the xCeNaY-c samples.

| Samples       | 150 °C (mmol/g)  |                  | 400 °C (mmol/g)  |                  |
|---------------|------------------|------------------|------------------|------------------|
|               | BAS <sup>a</sup> | LAS <sup>a</sup> | BAS <sup>a</sup> | LAS <sup>a</sup> |
| NaY           | 0                | 0.1245           | 0                | 0.0100           |
| 0.0025CeNaY-c | 0.0097           | 0.1631           | 0.0026           | 0.0047           |
| 0.005CeNaY-c  | 0.0141           | 0.1691           | 0.0044           | 0.0027           |
| 0.01CeNaY-c   | 0.0308           | 0.1665           | 0.0106           | 0.0047           |
| 0.015CeNaY-c  | 0.0511           | 0.1258           | 0.0176           | 0.0087           |
| 0.025CeNaY-c  | 0.0749           | 0.1038           | 0.0344           | 0.0173           |
| 0.05CeNaY-c   | 0.1066           | 0.0546           | 0.0502           | 0.0233           |

<sup>a</sup> Calculations based on the method reported by Emeis (*J. Catal.*, 1993, 141, 347–354), BAS and LAS represent the amount of Brønsted and Lewis acid, respectively.

**Table S5** Summary of Plausible OH and respective OD groups on CeY zeolite.

| OH group                                                  | $\nu_{\text{O-H}}$ , $\text{cm}^{-1}$ | $\nu_{\text{O-D}}$ , $\text{cm}^{-1}$ |
|-----------------------------------------------------------|---------------------------------------|---------------------------------------|
| terminal silanol groups<br>(Si-OH)                        | 3744                                  | 2754                                  |
| Si-OH-Al in the supercage<br>O(1)H                        | 3635                                  | 2670                                  |
| perturbed Si-OH-Al in the supercage<br>O(1)H...O(H)Ce     | 3622                                  | 2635                                  |
| Si-OH-Al in the sodalite cage<br>O(2)H                    | 3556                                  | 2620                                  |
| perturbed Si-OH-Al in the sodalite cage<br>O(2)H...O(H)Ce | 3523                                  | 2596                                  |

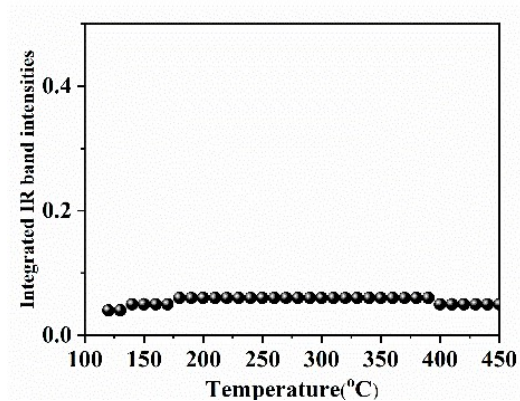

**Figure S1.** Temperature dependence of integrated IR band area for the silanol groups for the 0.05CeNaY-1-h sample.

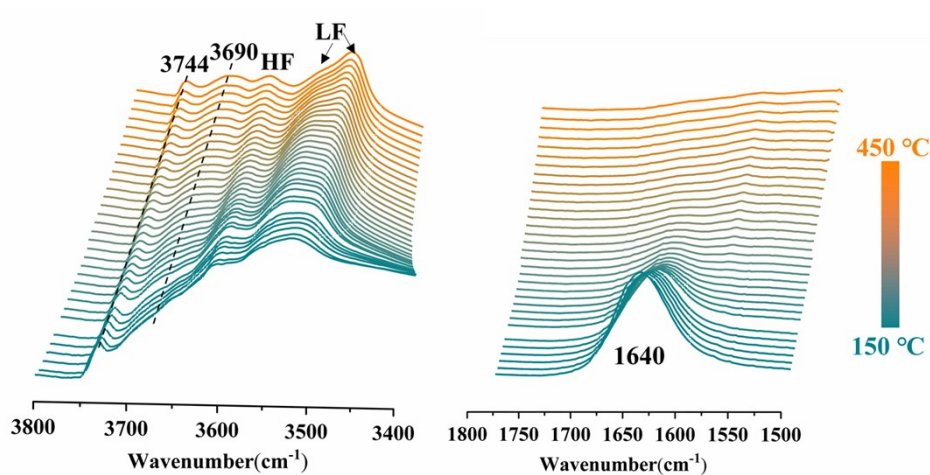

**Figure S2.** FTIR spectra acquired during dehydration of the 0.05CeNaY-2-h sample at various temperature. The words “HF” and “LF” reference as the high-frequency (HF) bands occurred at 3650-3610  $\text{cm}^{-1}$  and the low-frequency (LF) bands occurred at 3600-3515  $\text{cm}^{-1}$ , respectively.

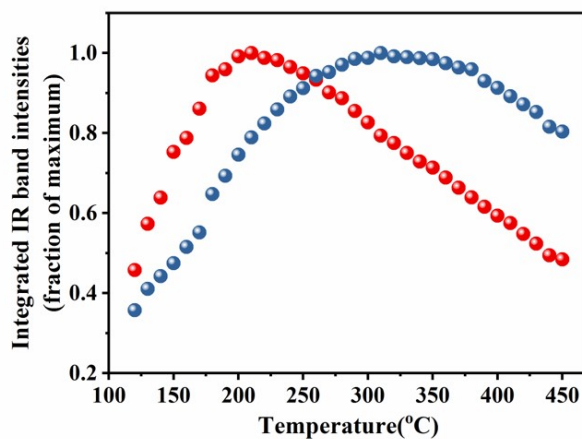

**Figure S3.** Temperature dependence of normalized integrated IR band intensities (fraction of maximum) for the HF bands (red) and LF bands (blue) presented in Figure S1 for the 0.05CeNaY-2-h sample.

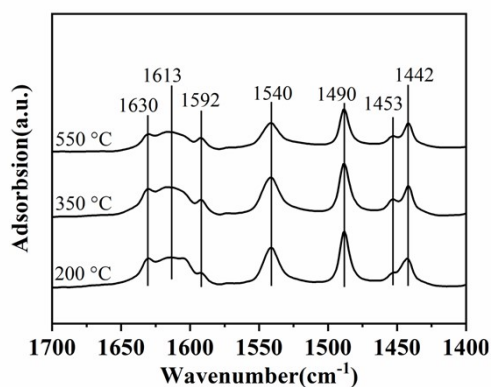

**Figure S4.** Py-FTIR spectra of the 0.05CeNaY samples with various calcination temperature.

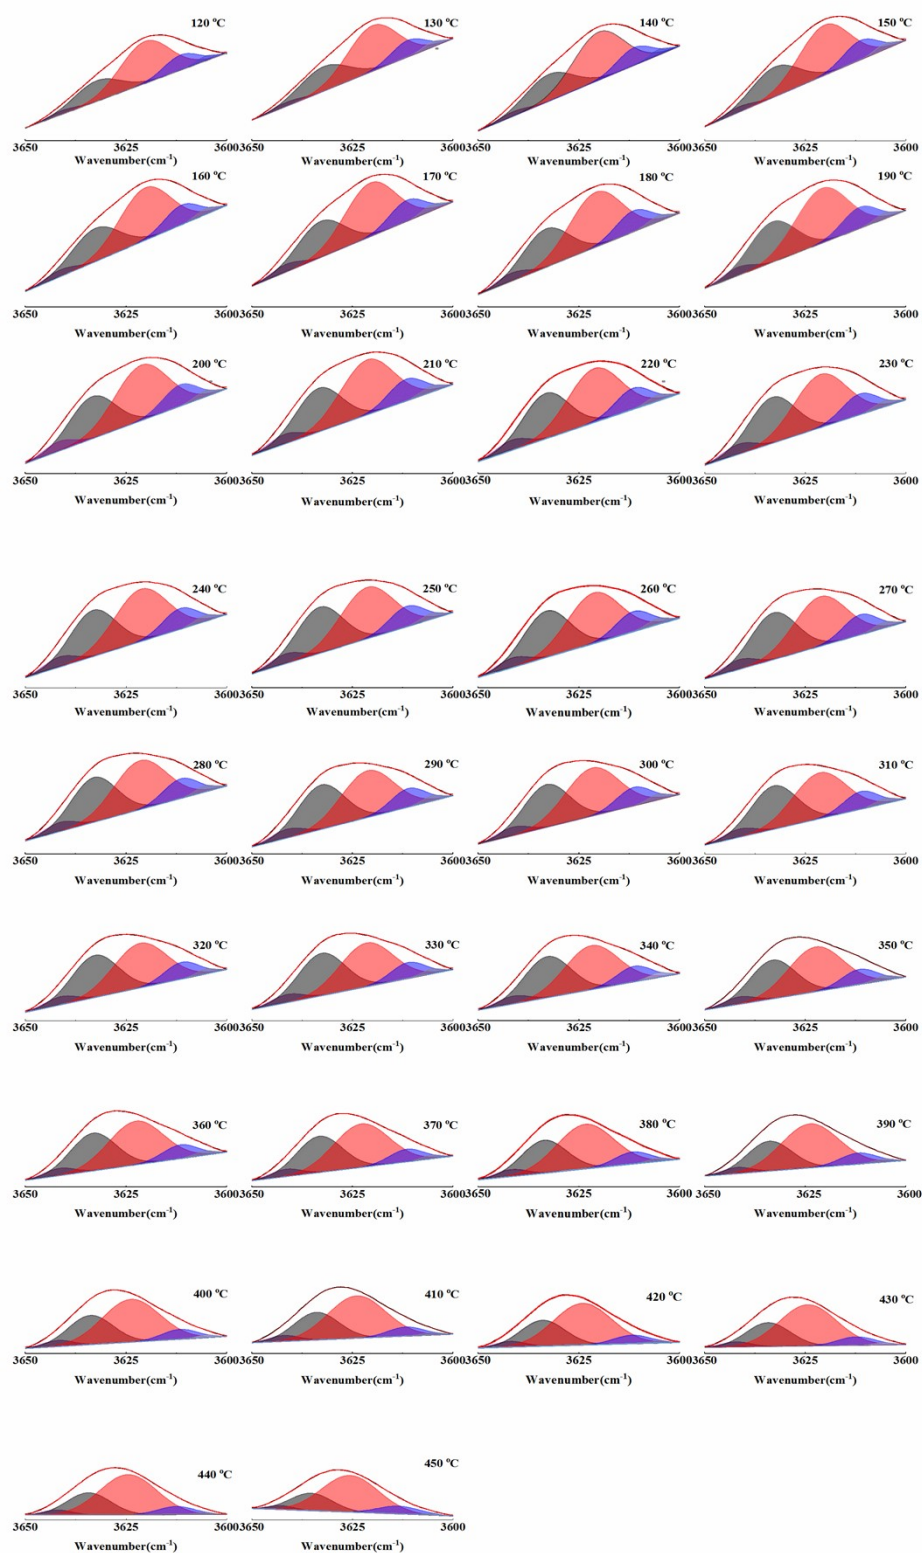

**Figure S5.** Deconvolution of the IR HF band of the 0.05CeNaY-1-h sample (*cf.* Figure 2) using four valid single bands. The color of purple, black, red and blue represent the bands of  $3640\text{ cm}^{-1}$ ,  $3633\text{ cm}^{-1}$ ,  $3622\text{ cm}^{-1}$  and  $3613\text{ cm}^{-1}$ , respectively.

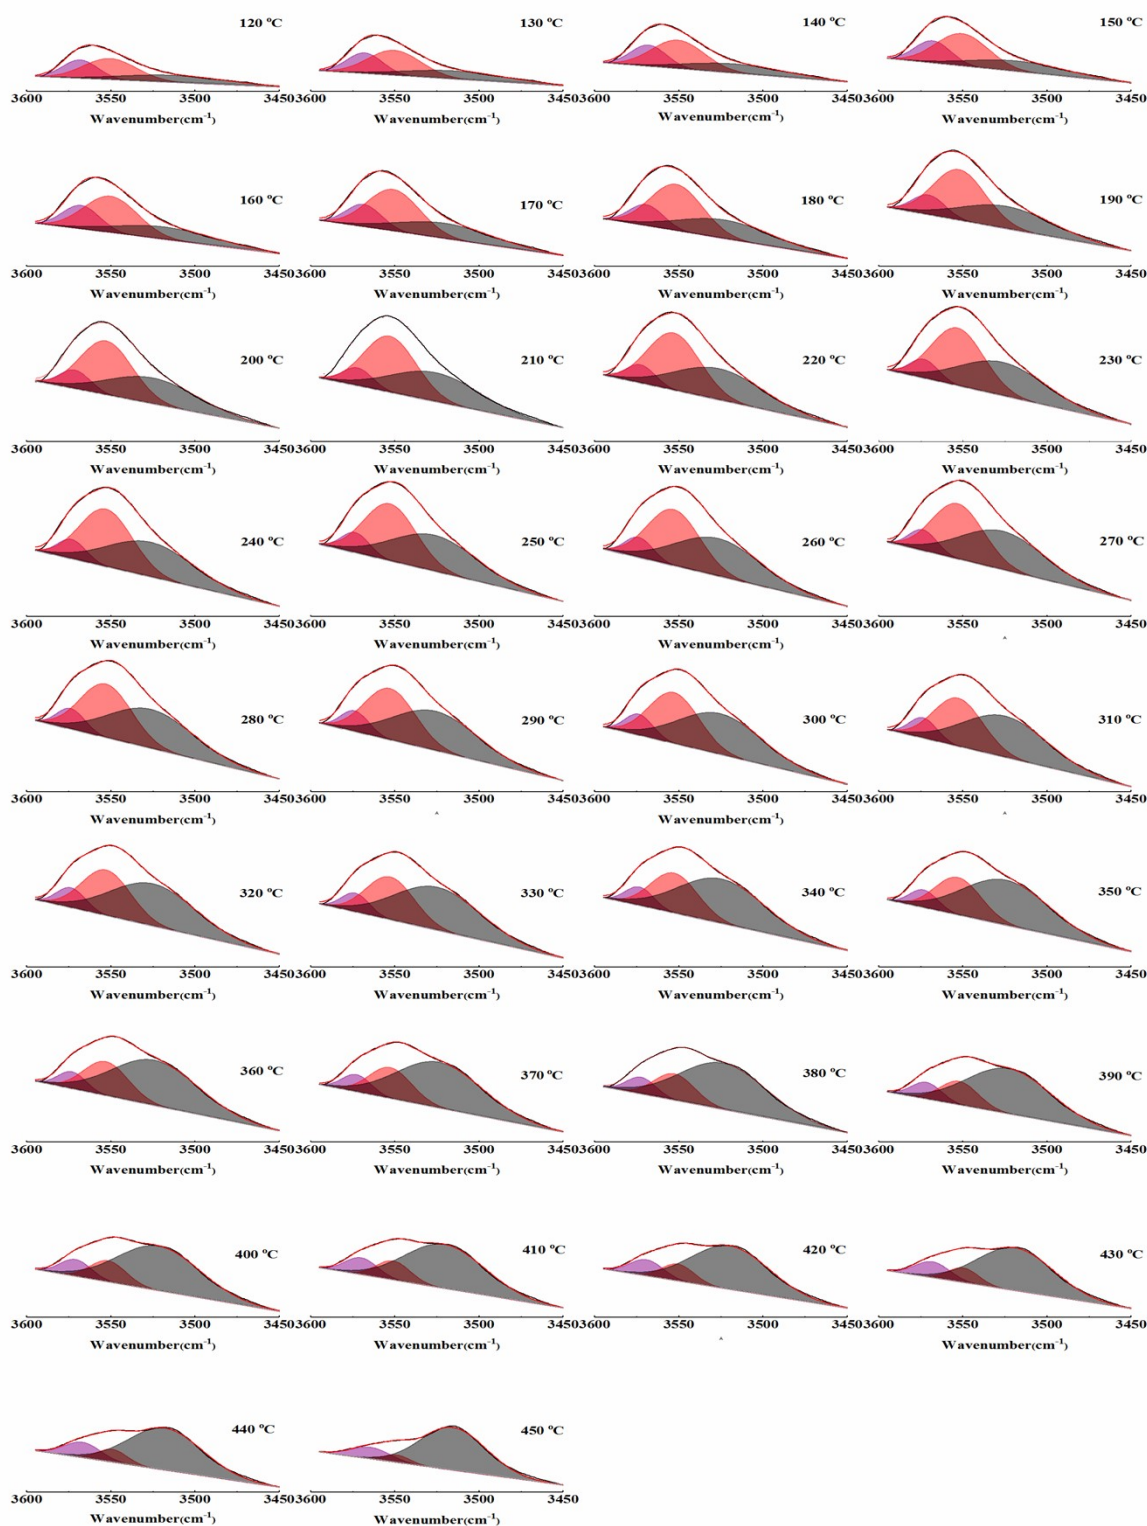

**Figure S6.** Deconvolution of the IR LF band of the 0.05CeNaY-1-h sample (*cf.* Figure 2) using three valid single bands. The color of purple, red and black represent the bands of  $3574\text{ cm}^{-1}$ ,  $3556\text{ cm}^{-1}$ , and  $3523\text{ cm}^{-1}$ , respectively.

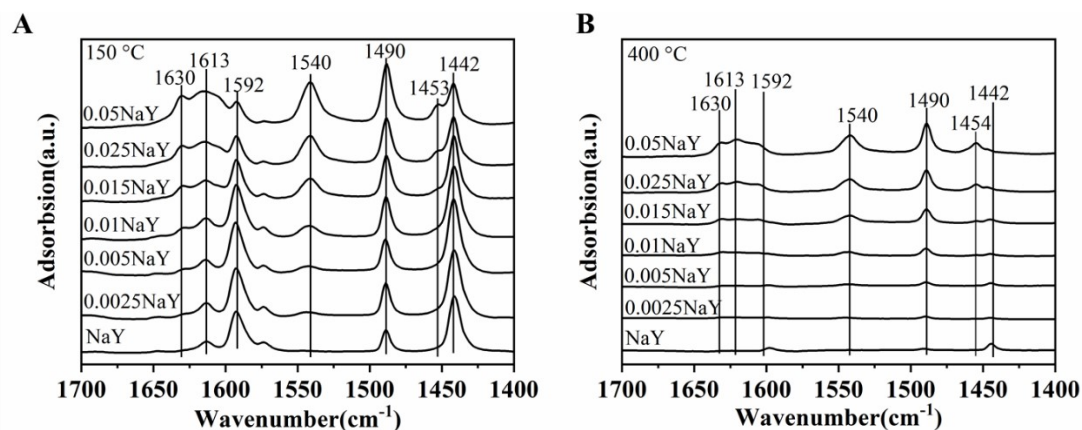

**Figure S7.** Py-FTIR spectra of the different samples adsorbed at (A) 150 °C and (B) 400 °C.

Note: The band at ca. 1540  $\text{cm}^{-1}$  assigned to the Brønsted acid sites can be observed. Besides, two bands at ca. 1442  $\text{cm}^{-1}$ , and ca. 1453  $\text{cm}^{-1}$  can be found which can be attributed to pyridine molecules coordinated to the  $\text{Na}^+$  ions and the extra-framework aluminum species, respectively. The amount of Brønsted acid sites on the  $x\text{CeNaY-c}$  samples correspondingly increases with the Ce concentrations (*cf.* Fig. S7 and Table S4). This is because that the  $\text{H}^+$  ions polarized by Ce hydroxylated species at the higher Ce concentrations are enough to replace the  $\text{Na}^+$  ions of NaY zeolite. Besides, the amount of Brønsted acid have a significant increase when the initial Ce concentration is between 0.0025  $\text{mol}\cdot\text{L}^{-1}$  and 0.025  $\text{mol}\cdot\text{L}^{-1}$ . Afterward, they show a trend of slow intensification (*cf.* Fig. S8). The result shows that Ce hydroxylated species remain in the supercage to occupy the proton sites and affect the hydroxyl groups in the supercage with the increase of Ce concentrations. Besides, it can be seen that the intensity of the band at 1453  $\text{cm}^{-1}$  strengthens with the initial Ce concentration rising, indicating that the number of extra-framework aluminum species correspondingly increase and further suggesting that the framework structure of Y has a slightly



destruction at the higher initial Ce concentration.

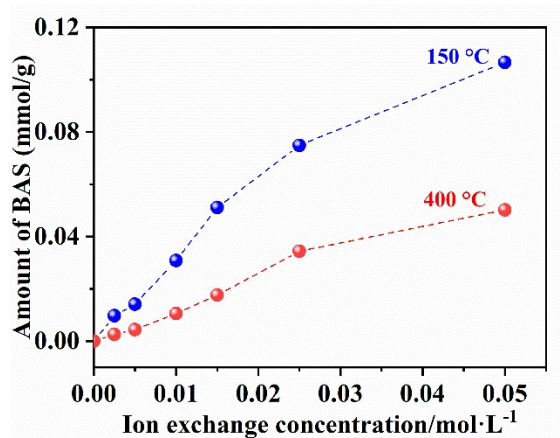

**Figure S8.** The amount of Brønsted acid in the  $x\text{CeNaY-c}$  samples with various Ce concentration.

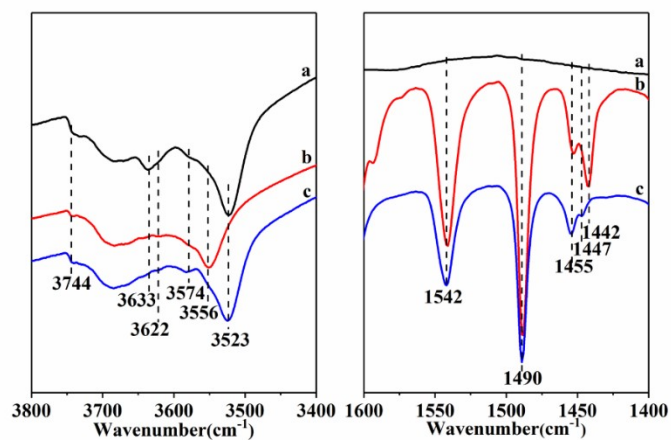

**Figure S9.** The FTIR spectra recorded after Pyridine adsorption for the  $0.05\text{CeNaY-1-c}$  sample. (a: background b: 150 °C desorption c: 400 °C desorption)

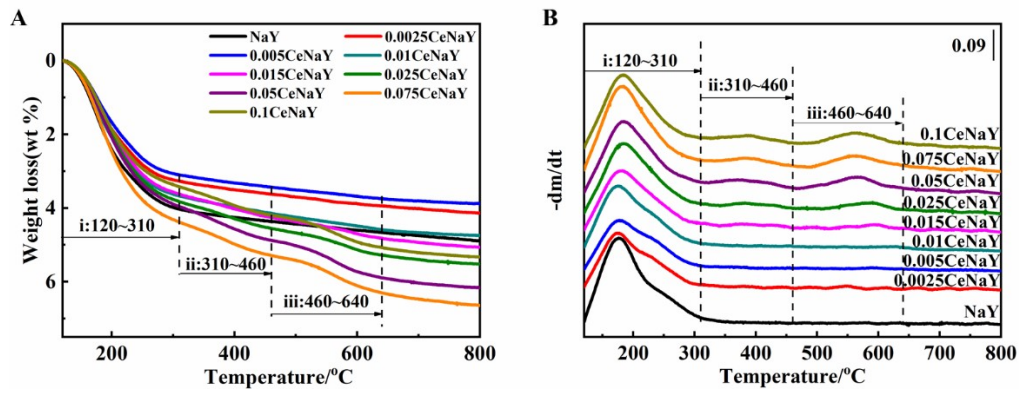

**Figure S10.** The TG curves (A) and the DTG curves(B) of xCeNaY-h zeolite samples with various Ce ion exchange concentration.
